# Supplementary material for: One-pot shorter time synthesis of Cu2O particles and nanoframes with novel shapes
Source: Royal Society of Chemistry journal article supplement (doi:10.1039/c1ce05505d), 2011-01-01
Supplement: c1ce05505d.pdf [file c1ce05505d.pdf]

## Electronic supplementary information

### One-pot shorter time synthesis of Cu<sub>2</sub>O particles and nanoframes with novel shapes

Lihua Yang, Yongming Sui, Wenyan Zhao, Wuyou Fu, Haibin Yang,\* Lina Zhang, Xiaoming Zhou, Shuli Cheng, Jinwen Ma, Hui Zhao and Minghui Li

*State Key Laboratory of Superhard Materials, Jilin University, Changchun 130012, P. R. China*

\*Corresponding author: Tel.: +86 431 85168763, fax: +86 431 85168763.

E-mail: yanghb@jlu.edu.cn

**Table 1** Synthesis conditions of Cu<sub>2</sub>O particles and nanoframes.

| Temperature & Time | CuSO <sub>4</sub> | Sodium mixture solution | C <sub>6</sub> H <sub>12</sub> O <sub>6</sub> | Stirring/ Aging     | Named                     |            |
|--------------------|-------------------|-------------------------|-----------------------------------------------|---------------------|---------------------------|------------|
| 80 °C, 15 min      | 2 ml              | 1 ml                    | 2.8 ml                                        |                     | nanosphere                | Fig. 4a, b |
| 80 °C, 15 min      | 2 ml              | 2 ml                    | 2.8 ml                                        |                     | cubes                     | Fig. 4c, d |
| 80 °C, 15 min      | 2 ml              | 4 ml                    | 2.8 ml                                        |                     | type-I Cu <sub>2</sub> O  | Fig. 2     |
| 80 °C, 15 min      | 2 ml              | 4 ml                    | 2.8 ml                                        | 12hours/<br>16 days | type-I nanoframes         | Fig. 6     |
| 80 °C, 15 min      | 2 ml              | 8 ml                    | 2.8 ml                                        |                     | type-II Cu <sub>2</sub> O | Fig. 3     |
| 80 °C, 15 min      | 2 ml              | 8 ml                    | 2.8 ml                                        | 12hours/<br>16 days | type-II Cu <sub>2</sub> O | Fig. 3     |
